# Supplementary material
Source: publisher site journal article supplement (https://www.dovepress.com/get_supplementary_file.php?f=342711.docx)
Supplement: Supplementary file 1 [file get_supplementary_file.php]

**Data collection tool: Interview and focus group discussion guide**

1. Please would you tell me about health developmental army structure?
2. Please would you tell me about the functionality of health developmental armies?
3. Please would you tell me the community-related barriers for the functional implementation of health developmental armies?
4. Please would you tell me the individual (health developmental army teams)-related barriers for the functional implementation of health developmental armies?
5. Please would you tell me the health facility-related barriers for the functional implementation of health developmental armies?
6. Please would you tell me your perceived impact or effect of health developmental armies on health care services utilization in your catchment?
7. Please would you tell me anything left about the health developmental armies, its functionality or impact?
8. Please would you summarize what we have discussed so far?
